# Supplementary material for: Experimental and Computational Evaluation of 1,2,4-Triazolium-Based Ionic Liquids for Carbon Dioxide Capture
Source: MDPI journal article supplement (doi:10.3390/separations10030192), 2023-03-10
Supplement: s1 [file s1]

Archive with 1 entries (1 files):
- separations-2220411-supplementary.pdf
